# Supplementary material
Source: publisher figshare collection journal article supplement (https://geolsoc.figshare.com/ndownloader/files/5425832)
Supplement: Supplementary file 1 [file 5425832]

Summary of SHRIMP U-Pb zircon results.
Sample CR44
								Total Ratios						Radiogenic Ratios								Age (Ma)
Grain.	U	Th	Th/U	Pb*	204Pb/	f206	238U/		207Pb/			206Pb/		207Pb/		207Pb/				206Pb/		207Pb/		%
spot	(ppm)	(ppm)		(ppm)	206Pb	%	206Pb	±	206Pb	±		238U	±	235U	±	206Pb	±	r		238U	±	206Pb	±	Disc
1.1	134	41	0.31	24.0	0.000074	0.12	4.792	0.078	0.0824	0.0014		0.2084	0.0034	2.339	0.083	0.0814	0.0026	0.465		1221	18	1231	62	1
2.1	116	143	1.23	19.3	0.000244	0.41	5.184	0.087	0.0791	0.0018		0.1929	0.0032	2.103	0.060	0.0791	0.0018	0.583		1137	22	1174	46	3
3.1	249	175	0.70	42.2	0.000227	0.38	5.067	0.076	0.0811	0.0009		0.1966	0.0030	2.112	0.061	0.0779	0.0019	0.523		1157	16	1144	49	-1
4.1	95	118	1.24	17.4	0.000268	0.45	4.692	0.082	0.0813	0.0016		0.2128	0.0037	2.351	0.062	0.0801	0.0016	0.660		1244	24	1200	39	-4
5.1	367	255	0.69	66.2	0.000034	0.06	4.761	0.062	0.0803	0.0008		0.2102	0.0028	2.350	0.039	0.0811	0.0008	0.799		1230	16	1223	19	-1
6.1	92	76	0.82	15.3	0.000304	0.51	5.175	0.096	0.0826	0.0016		0.1923	0.0036	2.076	0.105	0.0783	0.0037	0.374		1134	20	1155	93	2
7.1	640	347	0.54	112.3	0.000144	0.24	4.894	0.062	0.0904	0.0054		0.2039	0.0026	2.485	0.157	0.0884	0.0055	0.203		1196	14	1391	118	14
8.1	414	288	0.70	71.4	0.000017	0.03	4.979	0.060	0.0803	0.0007		0.2008	0.0024	2.217	0.032	0.0801	0.0007	0.828		1180	13	1199	16	2
9.1	177	121	0.68	30.8	0.000107	0.18	4.943	0.078	0.0805	0.0010		0.2019	0.0032	2.199	0.055	0.0790	0.0015	0.627		1186	17	1171	39	-1
10.1	219	179	0.82	39.2	-	<0.01	4.798	0.064	0.0811	0.0009		0.2085	0.0028	2.345	0.044	0.0816	0.0011	0.711		1221	15	1235	26	1
11.1	224	112	0.50	38.9	0.000201	0.34	4.939	0.066	0.0821	0.0010		0.2018	0.0027	2.208	0.042	0.0794	0.0011	0.709		1185	16	1181	26	0
12.1	209	206	0.99	26.3	0.000301	0.51	6.825	0.098	0.0768	0.0011		0.1458	0.0021	1.458	0.060	0.0726	0.0028	0.357		877	12	1002	78	12
13.1	364	237	0.65	61.6	0.000043	0.07	5.080	0.063	0.0799	0.0007		0.1967	0.0025	2.149	0.037	0.0792	0.0010	0.722		1158	13	1178	24	2
14.1	95	76	0.80	16.1	0.000111	0.19	5.069	0.087	0.0808	0.0014		0.1969	0.0034	2.150	0.075	0.0792	0.0024	0.495		1159	18	1177	60	2
15.1	189	144	0.76	31.6	0.000049	0.08	5.125	0.074	0.0800	0.0010		0.1950	0.0028	2.133	0.045	0.0793	0.0012	0.678		1148	15	1181	31	3
16.1	336	365	1.09	59.9	-	<0.01	4.820	0.060	0.0798	0.0007		0.2080	0.0026	2.352	0.037	0.0820	0.0008	0.796		1218	16	1246	18	2
17.1	1128	290	0.26	160.6	0.000280	0.47	6.031	0.065	0.0821	0.0004		0.1650	0.0018	1.777	0.029	0.0781	0.0009	0.672		985	10	1149	24	14
18.1	167	81	0.49	29.4	0.000079	0.13	4.875	0.071	0.0804	0.0010		0.2052	0.0030	2.286	0.044	0.0808	0.0010	0.756		1203	17	1216	25	1
19.1	97	81	0.83	14.7	0.000258	0.44	5.638	0.099	0.0761	0.0014		0.1770	0.0031	1.817	0.048	0.0744	0.0015	0.668		1051	20	1053	39	0
20.1	103	24	0.23	14.1	-	<0.01	6.307	0.109	0.0762	0.0015		0.1587	0.0028	1.685	0.048	0.0770	0.0017	0.609		950	15	1121	45	15
21.1	433	205	0.47	71.1	0.000036	0.06	5.226	0.063	0.0788	0.0008		0.1913	0.0023	2.065	0.034	0.0783	0.0009	0.732		1128	12	1154	22	2
23.1	280	248	0.88	45.4	0.000128	0.21	5.303	0.071	0.0794	0.0009		0.1882	0.0025	2.013	0.040	0.0776	0.0012	0.668		1112	14	1136	30	2
24.1	214	173	0.81	38.4	0.000046	0.08	4.778	0.067	0.0782	0.0009		0.2092	0.0029	2.236	0.045	0.0775	0.0011	0.687		1224	16	1135	29	-8
25.1	75	111	1.47	31.9	-	<0.01	2.034	0.055	0.0828	0.0015		0.5056	0.0137	7.375	0.296	0.1058	0.0031	0.676		2638	87	1728	54	-53
26.1	208	211	1.01	38.0	0.000001	<0.01	4.704	0.066	0.0810	0.0009		0.2126	0.0030	2.373	0.060	0.0810	0.0017	0.561		1242	16	1221	41	-2
27.1	183	133	0.73	31.9	0.000161	0.27	4.916	0.078	0.0821	0.0010		0.2029	0.0032	2.233	0.063	0.0799	0.0018	0.567		1191	17	1193	46	0
28.1	1551	1054	0.68	302.6	0.000043	0.07	4.403	0.047	0.0846	0.0003		0.2269	0.0024	2.629	0.031	0.0840	0.0005	0.891		1318	13	1293	11	-2
29.1	316	158	0.50	54.3	0.000059	0.10	5.006	0.063	0.0799	0.0008		0.1996	0.0025	2.175	0.036	0.0790	0.0009	0.753		1173	14	1173	22	0
30.1	391	146	0.37	65.4	0.000444	0.75	5.135	0.064	0.0809	0.0008		0.1935	0.0024	2.019	0.037	0.0757	0.0010	0.683		1141	14	1086	27	-5
31.1	213	158	0.74	25.9	-	<0.01	7.060	0.103	0.0679	0.0011		0.1421	0.0021	1.381	0.043	0.0705	0.0019	0.475		856	12	943	56	9
32.1	133	116	0.87	24.6	0.000090	0.15	4.655	0.081	0.0814	0.0012		0.2145	0.0038	2.369	0.062	0.0801	0.0016	0.667		1253	20	1199	39	-4
33.1	419	341	0.81	72.4	0.000006	0.01	4.973	0.060	0.0797	0.0006		0.2011	0.0024	2.208	0.032	0.0796	0.0006	0.831		1181	13	1188	16	1
34.1	245	163	0.66	56.0	0.000031	0.05	3.759	0.050	0.0938	0.0009		0.2659	0.0036	3.423	0.065	0.0934	0.0012	0.711		1520	18	1495	25	-2
35.1	153	164	1.07	25.7	0.000328	0.55	5.124	0.080	0.0808	0.0012		0.1951	0.0031	2.172	0.047	0.0807	0.0012	0.722		1149	20	1215	29	5
36.1	328	112	0.34	92.6	0.000064	0.10	3.042	0.037	0.1127	0.0008		0.3284	0.0040	5.065	0.078	0.1119	0.0010	0.800		1831	20	1830	17	0
37.1	108	69	0.64	18.9	0.000636	1.09	4.897	0.085	0.0795	0.0015		0.2027	0.0035	2.050	0.058	0.0733	0.0017	0.606		1190	21	1023	46	-16
38.1	487	134	0.28	89.4	0.000376	0.63	4.678	0.055	0.0854	0.0006		0.2124	0.0025	2.345	0.048	0.0800	0.0014	0.574		1242	13	1198	33	-4
39.1	293	258	0.88	46.2	0.000081	0.13	5.434	0.079	0.0825	0.0011		0.1838	0.0027	2.062	0.048	0.0814	0.0015	0.628		1088	15	1230	35	12
40.1	77	70	0.91	13.2	-	<0.01	5.013	0.092	0.0800	0.0015		0.1995	0.0037	2.208	0.059	0.0802	0.0015	0.692		1173	20	1203	38	3
41.1	314	153	0.49	53.1	-	<0.01	5.083	0.065	0.0793	0.0008		0.1971	0.0025	2.195	0.041	0.0808	0.0011	0.686		1160	14	1216	27	5
42.1	120	157	1.31	20.9	-	<0.01	4.915	0.078	0.0813	0.0012		0.2036	0.0032	2.301	0.052	0.0820	0.0013	0.709		1195	17	1245	31	4
43.1	223	120	0.54	42.8	0.000243	0.39	4.480	0.058	0.1001	0.0009		0.2223	0.0029	2.966	0.064	0.0967	0.0017	0.609		1294	15	1562	32	17
44.1	166	106	0.64	29.5	0.000005	0.01	4.826	0.071	0.0797	0.0010		0.2072	0.0030	2.276	0.047	0.0797	0.0012	0.703		1214	16	1189	29	-2
45.1	350	320	0.91	59.5	-	<0.01	5.057	0.068	0.0800	0.0007		0.1979	0.0026	2.194	0.036	0.0804	0.0008	0.810		1164	14	1207	19	4
46.1	728	291	0.40	133.4	0.000121	0.20	4.690	0.053	0.0814	0.0005		0.2131	0.0024	2.372	0.031	0.0807	0.0005	0.864		1245	14	1215	13	-2
47.1	226	229	1.01	39.6	0.000046	0.08	4.902	0.066	0.0816	0.0009		0.2038	0.0028	2.275	0.044	0.0809	0.0011	0.700		1196	15	1220	27	2
48.1	188	129	0.68	33.0	0.000217	0.36	4.899	0.070	0.0822	0.0010		0.2034	0.0029	2.218	0.047	0.0791	0.0012	0.672		1194	16	1175	31	-2
49.1	410	257	0.63	73.4	-	<0.01	4.804	0.063	0.0775	0.0007		0.2082	0.0028	2.231	0.036	0.0777	0.0007	0.818		1219	15	1140	18	-7
50.1	75	114	1.52	10.0	0.001874	3.29	6.421	0.137	0.0899	0.0022		0.1506	0.0035	1.304	0.180	0.0628	0.0086	0.168		904	20	701	290	-29
51.1	269	155	0.57	60.5	0.000073	0.12	3.826	0.048	0.0973	0.0008		0.2611	0.0033	3.466	0.055	0.0963	0.0009	0.804		1495	17	1553	18	4
52.1	149	99	0.66	24.2	0.000078	0.13	5.283	0.080	0.0790	0.0011		0.1891	0.0029	2.031	0.060	0.0779	0.0020	0.511		1116	16	1145	51	3
53.1	207	132	0.64	36.5	0.000120	0.20	4.876	0.067	0.0814	0.0009		0.2047	0.0028	2.250	0.049	0.0797	0.0013	0.635		1200	15	1190	33	-1
54.1	86	66	0.76	21.4	-	<0.01	3.459	0.059	0.0958	0.0014		0.2897	0.0050	3.901	0.101	0.0977	0.0019	0.659		1640	25	1580	37	-4
55.1	253	160	0.63	43.7	0.000468	0.78	4.961	0.065	0.0862	0.0009		0.2000	0.0026	2.195	0.066	0.0796	0.0021	0.443		1175	14	1187	53	1
56.1	113	77	0.68	19.5	0.000199	0.33	4.984	0.082	0.0812	0.0013		0.2000	0.0033	2.160	0.056	0.0784	0.0015	0.641		1175	18	1156	39	-2
57.1	73	45	0.61	8.6	-	<0.01	7.307	0.150	0.0725	0.0019		0.1376	0.0029	1.457	0.078	0.0768	0.0038	0.387		831	16	1117	99	26
58.1	141	134	0.95	27.0	0.001483	2.49	4.488	0.076	0.0993	0.0034		0.2172	0.0039	2.346	0.210	0.0783	0.0069	0.201		1267	21	1155	174	-10
59.1	385	321	0.83	85.2	0.000227	0.36	3.880	0.049	0.0992	0.0008		0.2568	0.0032	3.400	0.062	0.0960	0.0013	0.693		1473	17	1549	25	5
60.1	68	52	0.76	11.8	0.000203	0.34	4.916	0.092	0.0801	0.0016		0.2027	0.0038	2.159	0.095	0.0772	0.0031	0.429		1190	21	1127	79	-6
Sample CR190
								Total Ratios						Radiogenic Ratios								Age (Ma)
Grain.	U	Th	Th/U	Pb*	204Pb/	f206	238U/		207Pb/			206Pb/		207Pb/		207Pb/				206Pb/		207Pb/		%
spot	(ppm)	(ppm)		(ppm)	206Pb	%	206Pb	±	206Pb	±		238U	±	235U	±	206Pb	±	r		238U	±	206Pb	±	Disc
1.1	236	88	0.37	58.8	0.000268	0.42	3.453	0.045	0.1109	0.0009		0.2884	0.0038	4.266	0.084	0.1073	0.0016	0.666		1634	19	1754	27	7
2.1	160	67	0.42	44.2	0.000496	0.77	3.117	0.045	0.1172	0.0013		0.3184	0.0046	4.851	0.127	0.1105	0.0024	0.553		1782	23	1808	40	1
3.1	75	54	0.72	12.4	0.000087	0.15	5.207	0.098	0.0796	0.0015		0.1918	0.0036	2.072	0.084	0.0784	0.0028	0.466		1131	20	1156	72	2
4.1	207	98	0.47	44.0	-	<0.01	4.049	0.056	0.0856	0.0009		0.2474	0.0034	2.960	0.052	0.0868	0.0009	0.798		1425	19	1356	20	-5
5.1	65	41	0.63	9.8	0.000406	0.70	5.721	0.112	0.0757	0.0016		0.1764	0.0034	2.028	0.060	0.0834	0.0018	0.663		1047	21	1278	43	18
6.1	65	42	0.65	18.5	0.000387	0.61	3.001	0.056	0.1123	0.0016		0.3330	0.0062	5.126	0.119	0.1116	0.0016	0.799		1853	33	1826	25	-1
7.1	43	18	0.41	13.1	-	<0.01	2.842	0.062	0.1271	0.0020		0.3532	0.0077	6.351	0.189	0.1304	0.0026	0.736		1950	37	2103	35	7
8.1	65	70	1.08	25.1	0.000395	0.56	2.228	0.040	0.1662	0.0017		0.4463	0.0080	9.922	0.228	0.1612	0.0023	0.784		2379	36	2469	24	4
9.1	181	132	0.73	43.7	-	<0.01	3.559	0.049	0.1018	0.0009		0.2816	0.0039	4.025	0.075	0.1037	0.0013	0.747		1599	20	1691	23	5
10.1	631	406	0.64	101.9	0.001726	2.80	5.319	0.064	0.1157	0.0010		0.1827	0.0023	2.311	0.101	0.0917	0.0039	0.281		1082	12	1462	80	26
11.1	942	356	0.38	141.4	0.000017	0.03	5.725	0.063	0.0754	0.0005		0.1746	0.0019	1.810	0.024	0.0752	0.0005	0.836		1038	11	1073	14	3
12.1	501	123	0.25	73.0	0.000119	0.20	5.891	0.070	0.0740	0.0006		0.1697	0.0020	1.727	0.025	0.0738	0.0006	0.825		1011	12	1036	16	2
13.1	137	25	0.18	20.1	0.000118	0.20	5.875	0.104	0.0782	0.0011		0.1699	0.0030	1.793	0.048	0.0766	0.0015	0.669		1011	17	1110	40	9
14.1	355	333	0.94	116.5	0.000035	0.05	2.616	0.032	0.1512	0.0007		0.3820	0.0046	7.938	0.105	0.1507	0.0008	0.914		2086	22	2354	9	11
15.1	165	152	0.92	24.7	0.001305	2.20	5.748	0.085	0.0949	0.0012		0.1701	0.0026	1.792	0.110	0.0764	0.0046	0.250		1013	14	1105	119	8
16.1	217	441	2.03	28.5	0.000149	0.26	6.534	0.091	0.0714	0.0009		0.1527	0.0021	1.458	0.040	0.0693	0.0016	0.516		916	12	907	48	-1
17.1	74	73	0.98	12.4	-	<0.01	5.154	0.098	0.0810	0.0016		0.1944	0.0037	2.210	0.079	0.0825	0.0025	0.538		1145	20	1256	59	9
18.1	262	148	0.56	62.7	-	<0.01	3.594	0.051	0.1107	0.0009		0.2784	0.0040	4.266	0.072	0.1111	0.0010	0.852		1583	20	1818	16	13
19.1	77	119	1.55	18.8	0.000108	0.17	3.519	0.064	0.1064	0.0015		0.2837	0.0052	4.103	0.114	0.1049	0.0022	0.657		1610	26	1713	38	6
20.1	97	45	0.47	12.8	0.000297	0.51	6.504	0.117	0.0746	0.0016		0.1530	0.0028	1.483	0.081	0.0703	0.0036	0.336		918	16	937	106	2
21.1	200	155	0.77	70.1	0.000161	0.24	2.452	0.034	0.1447	0.0011		0.4068	0.0057	7.998	0.137	0.1426	0.0014	0.818		2200	26	2259	17	3
22.1	218	215	0.99	51.8	0.000669	1.03	3.611	0.049	0.1249	0.0011		0.2741	0.0037	4.378	0.104	0.1159	0.0022	0.577		1561	19	1893	35	18
23.1	48	31	0.66	12.6	0.000521	0.81	3.253	0.074	0.1170	0.0021		0.3049	0.0071	4.622	0.258	0.1100	0.0056	0.420		1715	35	1799	92	5
24.1	436	229	0.53	96.2	0.000043	0.07	3.891	0.046	0.0956	0.0006		0.2568	0.0031	3.363	0.048	0.0950	0.0007	0.844		1473	16	1528	14	4
25.1	111	97	0.87	26.7	-	<0.01	3.569	0.057	0.0989	0.0012		0.2803	0.0045	3.842	0.078	0.0994	0.0012	0.788		1593	23	1613	23	1
26.1	260	151	0.58	74.1	0.000064	0.10	3.017	0.039	0.1127	0.0008		0.3312	0.0042	5.106	0.079	0.1118	0.0010	0.825		1844	21	1829	16	-1
27.1	367	143	0.39	34.9	0.000183	0.32	9.036	0.116	0.0627	0.0008		0.1106	0.0014	0.951	0.018	0.0624	0.0008	0.697		676	9	686	28	1
28.1	129	31	0.24	20.7	0.000693	1.17	5.329	0.086	0.0874	0.0013		0.1855	0.0030	1.983	0.093	0.0776	0.0034	0.352		1097	17	1135	87	3
29.1	125	209	1.67	35.3	0.000015	0.02	3.042	0.048	0.1143	0.0012		0.3286	0.0052	5.169	0.098	0.1141	0.0012	0.826		1832	25	1866	19	2
30.1	224	304	1.36	58.8	0.000277	0.39	3.269	0.044	0.1631	0.0011		0.3047	0.0041	6.707	0.111	0.1596	0.0015	0.815		1715	20	2452	16	30
31.1	715	371	0.52	178.9	0.000047	0.07	3.435	0.038	0.1064	0.0005		0.2909	0.0032	4.244	0.052	0.1058	0.0005	0.917		1646	16	1728	9	5
32.1	45	48	1.07	5.9	0.000232	0.39	6.464	0.159	0.0792	0.0029		0.1534	0.0038	1.522	0.075	0.0720	0.0031	0.498		920	26	985	87	7
33.1	801	155	0.19	102.5	0.001079	1.82	6.712	0.075	0.0920	0.0006		0.1463	0.0017	1.548	0.055	0.0767	0.0026	0.322		880	9	1114	67	21
34.1	203	99	0.49	23.4	0.003617	5.92	7.476	0.143	0.1388	0.0176		0.1223	0.0023	1.110	0.362	0.0659	0.0214	0.059		744	25	802	682	7
35.1	211	120	0.57	35.7	0.000075	0.13	5.074	0.069	0.0802	0.0009		0.1968	0.0027	2.148	0.051	0.0791	0.0015	0.579		1158	14	1176	38	2
36.1	1008	19	0.02	150.9	0.000017	0.03	5.739	0.065	0.0913	0.0005		0.1742	0.0020	2.187	0.028	0.0911	0.0005	0.885		1035	11	1448	11	29
37.1	147	55	0.38	37.9	0.000115	0.18	3.337	0.052	0.1144	0.0012		0.2991	0.0046	4.653	0.098	0.1128	0.0016	0.736		1687	23	1845	26	9
38.1	239	199	0.83	70.4	0.000078	0.12	2.917	0.038	0.1224	0.0008		0.3424	0.0045	5.728	0.089	0.1213	0.0010	0.841		1898	21	1976	15	4
39.1	253	113	0.45	61.5	0.000128	0.20	3.533	0.047	0.1127	0.0009		0.2825	0.0037	4.321	0.075	0.1109	0.0012	0.768		1604	19	1815	20	12
40.1	222	147	0.66	40.8	0.001019	1.44	4.670	0.063	0.1746	0.0014		0.2111	0.0029	4.706	0.115	0.1617	0.0033	0.568		1234	16	2474	34	50
41.1	592	371	0.63	97.7	0.000053	0.09	5.202	0.060	0.0797	0.0006		0.1920	0.0022	2.089	0.034	0.0789	0.0009	0.708		1132	12	1170	23	3
42.1	219	57	0.26	40.1	0.000015	0.02	4.699	0.067	0.0868	0.0010		0.2127	0.0031	2.539	0.048	0.0866	0.0011	0.760		1243	16	1351	24	8
43.1	112	41	0.36	22.2	0.000394	0.66	4.325	0.071	0.0870	0.0012		0.2316	0.0038	2.829	0.061	0.0886	0.0013	0.756		1343	21	1395	27	4
44.1	179	160	0.90	28.0	0.000185	0.31	5.483	0.081	0.0795	0.0011		0.1818	0.0027	1.928	0.051	0.0769	0.0017	0.560		1077	15	1119	44	4
45.1	190	92	0.49	38.5	0.000787	1.23	4.242	0.058	0.1185	0.0011		0.2328	0.0032	3.462	0.099	0.1078	0.0027	0.486		1349	17	1763	46	23
46.1	126	76	0.61	21.4	0.000119	0.20	5.051	0.081	0.0788	0.0012		0.1979	0.0032	2.147	0.047	0.0787	0.0012	0.727		1164	19	1164	30	0
47.1	199	126	0.63	43.2	0.000052	0.08	3.967	0.055	0.1146	0.0010		0.2519	0.0035	3.955	0.072	0.1139	0.0013	0.771		1448	18	1862	21	22
48.1	115	57	0.49	24.0	0.000148	0.24	4.117	0.066	0.0960	0.0013		0.2423	0.0039	3.140	0.081	0.0940	0.0019	0.630		1399	20	1508	38	7
49.1	109	35	0.32	31.5	0.000255	0.40	2.969	0.047	0.1148	0.0012		0.3369	0.0053	5.339	0.102	0.1149	0.0012	0.831		1872	27	1879	19	0
50.1	95	57	0.59	21.4	0.000294	0.48	3.817	0.066	0.0972	0.0014		0.2607	0.0046	3.346	0.100	0.0931	0.0023	0.581		1494	23	1489	46	0
52.1	92	61	0.66	26.8	0.000153	0.23	2.942	0.054	0.1266	0.0017		0.3391	0.0062	5.821	0.146	0.1245	0.0021	0.735		1882	30	2022	30	7
53.1	180	73	0.40	23.8	0.000042	0.07	6.503	0.096	0.0725	0.0011		0.1537	0.0023	1.523	0.041	0.0719	0.0016	0.550		921	13	983	46	6
54.1	406	90	0.22	108.4	0.000021	0.03	3.219	0.039	0.1138	0.0010		0.3105	0.0037	4.859	0.075	0.1135	0.0011	0.784		1743	18	1856	17	6
55.1	491	230	0.47	65.4	0.000934	1.51	6.445	0.077	0.1068	0.0048		0.1503	0.0018	1.670	0.125	0.0806	0.0059	0.160		903	13	1212	145	26
56.1	106	96	0.90	52.0	0.000189	0.29	1.750	0.037	0.1189	0.0013		0.5765	0.0120	9.987	0.240	0.1256	0.0015	0.868		2934	59	2038	21	-44
57.1	63	28	0.45	18.4	0.000059	0.09	2.929	0.062	0.1126	0.0018		0.3411	0.0072	5.259	0.160	0.1118	0.0024	0.695		1892	35	1829	40	-3
58.1	153	75	0.49	48.9	0.000409	0.61	2.683	0.045	0.1365	0.0012		0.3704	0.0062	6.695	0.149	0.1311	0.0019	0.756		2031	29	2113	25	4
59.1	48	48	1.01	9.5	0.000334	0.56	4.340	0.099	0.0855	0.0020		0.2303	0.0053	2.702	0.089	0.0851	0.0020	0.697		1336	33	1318	46	-1
60.1	86	41	0.47	13.3	0.000358	0.57	5.592	0.106	0.1022	0.0019		0.1778	0.0035	2.385	0.110	0.0973	0.0041	0.421		1055	19	1573	79	33
61.1	610	389	0.64	105.7	0.001090	1.79	4.959	0.057	0.1016	0.0007		0.1981	0.0023	2.358	0.077	0.0864	0.0026	0.357		1165	12	1346	59	13
62.1	189	287	1.52	46.3	0.000355	0.55	3.511	0.051	0.1182	0.0011		0.2833	0.0041	4.430	0.105	0.1134	0.0021	0.611		1608	21	1855	34	13
63.1	386	110	0.29	50.2	0.000116	0.20	6.606	0.086	0.0757	0.0009		0.1511	0.0020	1.542	0.035	0.0740	0.0014	0.585		907	11	1042	37	13
Sample AM129A
								Total Ratios						Radiogenic Ratios								Age (Ma)
Grain.	U	Th	Th/U	Pb*	204Pb/	f206	238U/		207Pb/			206Pb/		207Pb/		207Pb/				206Pb/		207Pb/		%
spot	(ppm)	(ppm)		(ppm)	206Pb	%	206Pb	±	206Pb	±		238U	±	235U	±	206Pb	±	r		238U	±	206Pb	±	Disc
1.1	354	176	0.50	133	0.000068	0.10	2.294	0.026	0.1579	0.0005		0.4355	0.0050	9.431	0.114	0.1571	0.0006	0.945		2331	22	2424	7	4
2.1	385	226	0.59	40	0.005270	10.37	8.192	0.099	0.1470	0.0070		0.1094	0.0023							669	14
3.1	259	98	0.38	39	0.000055	0.09	5.639	0.068	0.0767	0.0006		0.1772	0.0021	1.856	0.030	0.0760	0.0008	0.762		1051	12	1094	21	4
4.1	623	68	0.11	85	0.000027	0.05	6.260	0.069	0.0723	0.0006		0.1597	0.0018	1.584	0.024	0.0719	0.0007	0.743		955	10	984	20	3
5.1	349	352	1.01	56	0.001409	2.39	5.316	0.062	0.0946	0.0009		0.1836	0.0022	1.886	0.091	0.0745	0.0035	0.248		1087	12	1055	95	-3
6.1	146	145	0.99	27	0.000305	0.51	4.646	0.060	0.0856	0.0009		0.2141	0.0028	2.401	0.060	0.0813	0.0017	0.520		1251	15	1230	42	-2
7.1	168	130	0.77	26	0.000067	0.11	5.651	0.073	0.0760	0.0007		0.1768	0.0023	1.829	0.043	0.0750	0.0015	0.553		1049	13	1070	40	2
8.1	455	252	0.55	57	0.000584	0.98	6.806	0.077	0.0851	0.0006		0.1455	0.0017	1.540	0.038	0.0768	0.0017	0.459		876	9	1115	44	21
9.1	258	196	0.76	70	0.000021	0.03	3.185	0.038	0.1140	0.0006		0.3139	0.0037	4.923	0.066	0.1138	0.0007	0.891		1760	18	1860	11	5
10.1	869	328	0.38	127	0.000208	0.35	5.866	0.063	0.0790	0.0004		0.1699	0.0018	1.781	0.026	0.0761	0.0007	0.747		1011	10	1097	19	8
11.1	898	193	0.21	68	0.000015	0.44	11.299	0.127	0.0620	0.0004		0.0881	0.0010							544	6
12.1	634	84	0.13	98	0.000020	0.03	5.549	0.060	0.0771	0.0004		0.1802	0.0020	1.909	0.024	0.0769	0.0005	0.878		1068	11	1118	12	4
13.1	242	126	0.52	33	0.000004	0.01	6.401	0.078	0.0746	0.0007		0.1562	0.0019	1.606	0.026	0.0746	0.0008	0.768		936	11	1057	21	11
14.1	597	78	0.13	145	0.000134	0.21	3.532	0.039	0.1092	0.0004		0.2826	0.0032	4.184	0.051	0.1074	0.0005	0.912		1604	16	1756	9	9
15.1	343	212	0.62	58	0.003102	5.28	5.115	0.062	0.1179	0.0027		0.1852	0.0024	1.880	0.188	0.0737	0.0073	0.130		1095	13	1032	200	-6
16.1	444	263	0.59	102	0.000079	0.13	3.751	0.042	0.1000	0.0004		0.2663	0.0030	3.632	0.046	0.0989	0.0006	0.885		1522	15	1604	11	5
17.1	497	102	0.20	87	0.000301	0.51	4.927	0.057	0.0798	0.0006		0.2031	0.0024	2.254	0.031	0.0805	0.0006	0.838		1192	13	1209	15	1
18.1	255	38	0.15	39	-	<0.01	5.667	0.072	0.0754	0.0006		0.1766	0.0023	1.856	0.032	0.0762	0.0009	0.730		1048	12	1100	24	5
19.1	232	79	0.34	94	-	<0.01	2.130	0.027	0.1376	0.0012		0.4696	0.0059	8.916	0.137	0.1377	0.0012	0.818		2482	26	2199	15	-13
20.1	403	253	0.63	59	-	<0.01	5.895	0.067	0.0724	0.0005		0.1699	0.0019	1.728	0.028	0.0738	0.0008	0.706		1012	11	1035	23	2
21.1	922	98	0.11	394	0.000013	0.02	2.010	0.022	0.1520	0.0005		0.4974	0.0055	10.417	0.119	0.1519	0.0005	0.955		2603	23	2367	6	-10
22.1	114	137	1.20	19	0.000114	0.19	5.059	0.072	0.0800	0.0011		0.1973	0.0028	2.132	0.049	0.0784	0.0014	0.626		1161	15	1156	36	0
23.1	120	49	0.40	18	0.000195	0.33	5.905	0.081	0.0755	0.0009		0.1688	0.0023	1.692	0.052	0.0727	0.0020	0.453		1005	13	1005	55	0
24.1	105	158	1.51	17	-	<0.01	5.153	0.072	0.0803	0.0010		0.1942	0.0027	2.167	0.046	0.0809	0.0013	0.654		1144	15	1220	32	6
25.1	1060	792	0.75	148	0.001665	2.81	6.164	0.065	0.1004	0.0009		0.1577	0.0017	1.668	0.078	0.0767	0.0035	0.227		944	9	1115	91	15
26.1	94	72	0.77	7	-	0.36	11.859	0.211	0.0607	0.0017		0.0840	0.0015							520	9
27.1	167	198	1.19	34	0.000154	0.26	4.183	0.067	0.0781	0.0010		0.2395	0.0038	2.627	0.054	0.0796	0.0010	0.774		1384	24	1186	26	-17
28.1	180	187	1.04	47	0.000028	0.04	3.254	0.040	0.1084	0.0007		0.3072	0.0038	4.576	0.069	0.1080	0.0009	0.825		1727	19	1767	16	2
29.1	436	232	0.53	78	0.000038	0.06	4.789	0.057	0.0751	0.0007		0.2087	0.0025	2.145	0.036	0.0745	0.0008	0.726		1222	13	1056	23	-16
30.1	105	124	1.18	23	0.000234	0.40	3.949	0.075	0.0786	0.0016		0.2522	0.0048	2.617	0.101	0.0752	0.0025	0.495		1450	25	1075	67	-35
31.1	72	90	1.25	13	-	<0.01	4.710	0.099	0.0802	0.0020		0.2127	0.0045	2.391	0.092	0.0816	0.0026	0.550		1243	24	1235	63	-1
32.1	195	933	4.78	41	-	<0.01	4.136	0.054	0.0855	0.0009		0.2419	0.0032	2.874	0.051	0.0862	0.0010	0.738		1397	17	1342	23	-4
33.1	210	170	0.81	50	0.000063	0.10	3.580	0.046	0.0972	0.0008		0.2797	0.0036	3.793	0.058	0.0984	0.0008	0.831		1590	20	1593	16	0
34.1	215	124	0.58	66	0.000116	0.19	2.809	0.047	0.0963	0.0011		0.3582	0.0060	4.997	0.103	0.1012	0.0012	0.805		1973	30	1646	23	-20
35.1	31	24	0.78	6	0.000488	0.82	4.424	0.125	0.0856	0.0023		0.2242	0.0066	2.432	0.223	0.0787	0.0068	0.319		1304	34	1164	172	-12
36.1	842	822	0.98	113	0.001452	2.42	6.429	0.079	0.1010	0.0010		0.1518	0.0019	1.686	0.083	0.0805	0.0038	0.258		911	11	1210	94	25
37.1	257	91	0.35	41	-	<0.01	5.353	0.073	0.0751	0.0010		0.1873	0.0026	1.992	0.058	0.0771	0.0020	0.469		1107	14	1125	52	2
38.1	182	108	0.59	34	-	<0.01	4.560	0.073	0.0738	0.0012		0.2201	0.0036	2.341	0.100	0.0771	0.0030	0.380		1283	19	1124	79	-14
39.1	544	208	0.38	249	0.000726	1.07	1.879	0.027	0.1483	0.0011		0.5264	0.0076	10.075	0.216	0.1388	0.0022	0.673		2726	32	2212	27	-23
40.1	793	271	0.34	142	0.000115	0.20	4.806	0.060	0.0719	0.0007		0.2077	0.0026	2.012	0.050	0.0703	0.0015	0.509		1216	14	936	44	-30
41.1	635	94	0.15	99	0.000047	0.08	5.481	0.062	0.0758	0.0005		0.1824	0.0021	1.905	0.025	0.0757	0.0005	0.849		1080	11	1088	14	1
42.1	611	186	0.30	145	-	<0.01	3.627	0.042	0.1042	0.0005		0.2740	0.0032	3.743	0.053	0.0991	0.0008	0.818		1561	17	1607	15	3
43.1	442	135	0.30	178	0.000010	0.01	2.134	0.024	0.1568	0.0011		0.4686	0.0053	10.124	0.133	0.1567	0.0011	0.858		2477	23	2420	11	-2
44.1	82	87	1.06	22	0.000073	0.12	3.252	0.055	0.1002	0.0014		0.3071	0.0052	4.200	0.106	0.0992	0.0019	0.664		1727	26	1609	35	-7
45.1	223	236	1.06	53	0.000179	0.30	3.620	0.061	0.0820	0.0014		0.2754	0.0047	3.019	0.083	0.0795	0.0017	0.618		1568	24	1185	43	-32
46.1	88	75	0.85	18	0.000208	0.35	4.296	0.083	0.0799	0.0017		0.2329	0.0045	2.583	0.074	0.0804	0.0017	0.674		1350	27	1208	42	-12
47.1	212	220	1.03	54	0.002880	4.57	3.373	0.049	0.1405	0.0043		0.2829	0.0044	3.937	0.324	0.1009	0.0081	0.188		1606	22	1642	150	2
48.1	97	33	0.34	32	0.000908	1.25	2.628	0.050	0.1897	0.0021		0.3757	0.0073	9.250	0.266	0.1785	0.0038	0.673		2056	34	2639	35	22
49.1	154	93	0.60	31	0.000132	0.21	4.338	0.071	0.0974	0.0013		0.2300	0.0038	3.033	0.071	0.0956	0.0016	0.701		1335	20	1540	31	13
50.1	33	39	1.17	5	0.000795	1.38	5.337	0.139	0.0779	0.0023		0.1886	0.0049	2.175	0.084	0.0836	0.0024	0.673		1114	33	1283	56	13
51.1	32	46	1.45	7	-	<0.01	3.824	0.118	0.1058	0.0024		0.2622	0.0081	3.909	0.149	0.1081	0.0024	0.807		1501	41	1768	41	15
52.1	990	74	0.08	135	0.000072	0.12	6.313	0.071	0.0769	0.0005		0.1582	0.0018	1.655	0.024	0.0759	0.0007	0.776		947	10	1092	18	13
53.1	264	77	0.29	56	0.000501	0.81	4.062	0.060	0.0992	0.0027		0.2442	0.0036	3.106	0.117	0.0923	0.0032	0.393		1408	19	1473	66	4
54.1	142	114	0.80	36	-	<0.01	3.440	0.053	0.1065	0.0016		0.2910	0.0045	4.306	0.100	0.1073	0.0019	0.665		1646	22	1754	32	6
55.1	326	269	0.82	47	0.000063	0.11	5.958	0.075	0.0727	0.0007		0.1677	0.0021	1.661	0.029	0.0718	0.0009	0.722		999	12	982	25	-2
56.1	129	125	0.98	26	0.001623	2.74	4.307	0.069	0.0988	0.0032		0.2273	0.0036	2.536	0.129	0.0810	0.0039	0.312		1320	23	1220	95	-8
57.1	522	271	0.52	92	0.000014	0.02	4.889	0.060	0.0782	0.0005		0.2048	0.0025	2.239	0.032	0.0793	0.0006	0.865		1201	14	1179	14	-2
58.1	401	193	0.48	63	-	<0.01	5.475	0.067	0.0758	0.0007		0.1828	0.0022	1.922	0.030	0.0763	0.0008	0.776		1082	12	1102	20	2
59.1	129	106	0.82	21	0.000070	0.12	5.368	0.088	0.0830	0.0013		0.1861	0.0031	2.105	0.051	0.0820	0.0015	0.674		1100	17	1246	35	12
60.1	325	109	0.34	68	0.000085	0.14	4.085	0.051	0.0848	0.0007		0.2449	0.0030	2.870	0.042	0.0850	0.0007	0.848		1412	17	1316	15	-7
Sample IWH043B
								Total Ratios						Radiogenic Ratios								Age (Ma)
Grain.	U	Th	Th/U	Pb*	204Pb/	f206	238U/		207Pb/			206Pb/		207Pb/		207Pb/				206Pb/		207Pb/		%
spot	(ppm)	(ppm)		(ppm)	206Pb	%	206Pb	±	206Pb	±		238U	±	235U	±	206Pb	±	r		238U	±	206Pb	±	Disc
1.1	73	58	0.79	13	0.000267	0.45	4.744	0.066	0.0815	0.0011		0.2100	0.0029	2.264	0.047	0.0782	0.0012	0.671		1229	18	1152	31	-7
2.1	104	78	0.75	19	0.000036	0.06	4.706	0.061	0.0798	0.0009		0.2131	0.0028	2.416	0.042	0.0822	0.0010	0.740		1245	16	1251	23	0
3.1	199	75	0.38	35	0.000043	0.07	4.941	0.059	0.0803	0.0007		0.2022	0.0024	2.222	0.034	0.0797	0.0007	0.791		1187	13	1190	18	0
4.1	257	69	0.27	45	-	<0.01	4.922	0.056	0.0786	0.0006		0.2032	0.0023	2.210	0.030	0.0789	0.0006	0.834		1193	12	1168	15	-2
5.1	333	219	0.66	59	0.000029	0.05	4.887	0.054	0.0804	0.0005		0.2045	0.0023	2.257	0.029	0.0800	0.0005	0.857		1200	12	1197	13	0
6.1	381	151	0.40	68	0.000020	0.03	4.828	0.053	0.0792	0.0005		0.2071	0.0023	2.258	0.028	0.0791	0.0005	0.872		1213	13	1174	12	-3
7.1	108	109	1.02	19	0.000082	0.14	4.870	0.062	0.0797	0.0009		0.2051	0.0026	2.227	0.038	0.0787	0.0009	0.742		1203	17	1166	23	-3
8.1	107	84	0.78	19	0.000041	0.07	4.867	0.065	0.0793	0.0009		0.2053	0.0028	2.228	0.042	0.0787	0.0010	0.716		1204	15	1164	26	-3
9.1	159	127	0.80	39	0.000058	0.09	3.501	0.041	0.0976	0.0008		0.2853	0.0034	3.807	0.058	0.0968	0.0009	0.779		1618	17	1562	18	-4
10.1	258	190	0.73	46	0.000017	0.03	4.815	0.054	0.0801	0.0006		0.2077	0.0023	2.297	0.031	0.0802	0.0006	0.837		1216	14	1202	15	-1
11.1	189	107	0.57	33	-	<0.01	4.860	0.057	0.0804	0.0007		0.2058	0.0024	2.287	0.033	0.0806	0.0007	0.807		1206	13	1212	17	0
12.1	47	64	1.36	8	-	<0.01	4.851	0.076	0.0784	0.0014		0.2066	0.0032	2.286	0.054	0.0802	0.0014	0.666		1211	17	1203	34	-1
13.1	154	137	0.89	27	0.000036	0.06	4.894	0.059	0.0804	0.0008		0.2042	0.0025	2.251	0.036	0.0799	0.0008	0.765		1198	13	1195	20	0
14.1	124	236	1.91	23	0.000061	0.10	4.711	0.059	0.0803	0.0010		0.2120	0.0027	2.323	0.042	0.0795	0.0010	0.696		1240	14	1184	26	-5
15.1	191	478	2.50	33	0.000020	0.03	4.982	0.058	0.0791	0.0011		0.2007	0.0024	2.180	0.039	0.0788	0.0011	0.652		1179	13	1167	27	-1
16.1	430	186	0.43	97	0.000023	0.04	3.793	0.042	0.0934	0.0005		0.2636	0.0029	3.384	0.041	0.0931	0.0005	0.906		1508	15	1490	10	-1
17.1	59	44	0.75	11	-	<0.01	4.813	0.073	0.0809	0.0014		0.2078	0.0032	2.317	0.053	0.0809	0.0014	0.667		1217	17	1218	34	0
17.2	195	162	0.83	34	-	<0.01	4.950	0.058	0.0803	0.0007		0.2021	0.0024	2.251	0.033	0.0808	0.0007	0.807		1187	13	1216	17	2
18.1	62	64	1.04	11	0.000105	0.18	4.909	0.072	0.0803	0.0012		0.2033	0.0030	2.210	0.053	0.0788	0.0015	0.617		1193	16	1168	37	-2
19.1	104	61	0.59	19	0.000085	0.14	4.808	0.063	0.0797	0.0010		0.2082	0.0027	2.308	0.041	0.0804	0.0010	0.736		1219	16	1207	24	-1
20.1	115	196	1.71	20	0.000107	0.18	4.837	0.062	0.0806	0.0009		0.2064	0.0026	2.251	0.040	0.0791	0.0010	0.713		1209	14	1175	25	-3
21.1	355	608	1.71	63	0.000017	0.03	4.870	0.054	0.0801	0.0005		0.2053	0.0023	2.259	0.029	0.0798	0.0005	0.855		1204	12	1192	13	-1
22.1	234	456	1.95	40	0.000055	0.09	5.052	0.058	0.0788	0.0006		0.1978	0.0023	2.127	0.031	0.0780	0.0007	0.797		1163	12	1147	17	-1
23.1	130	53	0.40	24	0.000043	0.07	4.735	0.059	0.0788	0.0008		0.2110	0.0026	2.274	0.038	0.0782	0.0009	0.740		1234	14	1151	22	-7
Sample AM57
								Total Ratios						Radiogenic Ratios								Age (Ma)
Grain.	U	Th	Th/U	Pb*	204Pb/	f206	238U/		207Pb/			206Pb/		207Pb/		207Pb/				206Pb/		207Pb/		%
spot	(ppm)	(ppm)		(ppm)	206Pb	%	206Pb	±	206Pb			238U	±	235U		206Pb	±	r		238U	±	206Pb	±	Disc
1.1	624	137	0.22	54	0.000624	1.20	9.900	0.109	0.0701	0.0005		0.0998	0.0011							613	7
2.1	98	56	0.57	14	0.000519	0.88	6.220	0.104	0.0823	0.0016		0.1594	0.0028	1.646	0.091	0.0749	0.0040	0.311		953	15	1066	106	12
3.1	227	105	0.46	15	0.000294	0.54	13.360	0.187	0.0571	0.0012		0.0744	0.0011							463	7
4.1	120	130	1.09	43	0.000087	0.12	2.387	0.038	0.1564	0.0012		0.4184	0.0066	8.957	0.163	0.1553	0.0014	0.869		2253	30	2405	15	7
5.1	162	107	0.66	11	-	<0.01	12.295	0.160	0.0572	0.0009		0.0813	0.0011							504	6
6.1	1112	38	0.03	255	0.000015	0.02	3.749	0.042	0.1041	0.0004		0.2666	0.0030	3.818	0.045	0.1039	0.0004	0.940		1524	15	1694	7	11
7.1	1031	140	0.14	96	0.000069	0.12	9.251	0.104	0.0627	0.0007		0.1080	0.0012							661	7
8.1	431	208	0.48	31	0.000043	0.02	11.823	0.153	0.0580	0.0005		0.0846	0.0011							523	7
9.1	72	83	1.16	6	0.001378	2.58	10.779	0.221	0.0629	0.0019		0.0904	0.0020							558	12
10.1	1624	272	0.17	127	0.003187	6.18	10.988	0.119	0.1083	0.0008		0.0854	0.0012							528	7
11.1	550	132	0.24	45	0.000907	1.62	10.488	0.124	0.0715	0.0007		0.0938	0.0011							578	7
12.1	802	405	0.50	71	0.000081	0.14	9.635	0.110	0.0631	0.0006		0.1036	0.0012							636	7
13.1	394	80	0.20	91	0.000000	0.00	3.723	0.044	0.0980	0.0006		0.2686	0.0032	3.628	0.049	0.0979	0.0006	0.877		1534	16	1585	12	3
14.1	361	191	0.53	85	0.000025	0.04	3.628	0.043	0.0989	0.0006		0.2755	0.0033	3.745	0.053	0.0986	0.0008	0.838		1569	17	1598	15	2
15.1	1422	417	0.29	79	0.007572	14.11	15.378	0.165	0.1672	0.0007		0.0559	0.0013							350	8
16.1	62	139	2.26	9	0.000642	1.12	5.778	0.103	0.0751	0.0016		0.1718	0.0031	1.637	0.051	0.0691	0.0018	0.573		1022	27	902	53	-13
17.1	584	269	0.46	32	0.004695	8.70	15.503	0.225	0.1241	0.0090		0.0589	0.0013							369	8
18.1	583	97	0.17	40	0.000081	0.17	12.536	0.139	0.0584	0.0005		0.0796	0.0009							494	5
19.1	443	426	0.96	35	0.000033	0.06	10.752	0.129	0.0604	0.0007		0.0929	0.0011							573	7
20.1	617	325	0.53	43	-	0.08	12.209	0.135	0.0581	0.0005		0.0818	0.0009							507	5
21.1	481	155	0.32	72	0.000051	0.09	5.741	0.068	0.0756	0.0006		0.1740	0.0021	1.797	0.028	0.0749	0.0007	0.771		1034	11	1065	20	3
22.1	418	100	0.24	32	0.002671	4.94	11.336	0.137	0.0879	0.0027		0.0839	0.0011							519	7
22.2	838	4	0.00	59	0.000046	0.05	12.292	0.147	0.0577	0.0004		0.0813	0.0010							504	6
23.1	403	306	0.76	98	0.000010	0.02	3.539	0.042	0.1080	0.0006		0.2826	0.0033	4.201	0.055	0.1078	0.0006	0.891		1604	17	1763	11	10
24.1	276	124	0.45	41	0.000079	0.14	5.848	0.091	0.0735	0.0009		0.1708	0.0027	1.703	0.034	0.0723	0.0009	0.791		1016	15	996	25	-2
25.1	115	56	0.49	22	0.000251	0.41	4.467	0.067	0.0982	0.0017		0.2229	0.0034	2.913	0.085	0.0948	0.0024	0.515		1297	18	1523	47	17
26.1	309	76	0.25	145	0.000003	0.00	1.827	0.024	0.1971	0.0007		0.5474	0.0071	14.873	0.200	0.1970	0.0008	0.958		2815	29	2802	6	0
27.1	146	285	1.94	24	0.000004	0.01	5.266	0.074	0.0795	0.0011		0.1899	0.0027	2.080	0.042	0.0795	0.0012	0.696		1121	14	1184	29	6
28.1	1400	173	0.12	109	0.002860	5.05	11.035	0.122	0.1026	0.0010		0.0860	0.0010							532	6
28.2	714	343	0.48	71	0.002228	4.55	8.594	0.093	0.0995	0.0006		0.1111	0.0014							679	8
29.1	512	393	0.77	36	-	0.06	12.391	0.138	0.0577	0.0005		0.0807	0.0009							500	5
30.1	635	203	0.32	89	0.000026	0.04	6.099	0.072	0.0739	0.0005		0.1639	0.0019	1.662	0.024	0.0735	0.0006	0.834		978	11	1029	16	5
31.1	157	56	0.36	24	0.000127	0.22	5.593	0.117	0.0762	0.0010		0.1784	0.0037	1.831	0.057	0.0744	0.0017	0.675		1058	20	1053	46	0
32.1	158	128	0.81	26	0.000177	0.30	5.206	0.072	0.0817	0.0010		0.1915	0.0027	2.092	0.067	0.0792	0.0023	0.438		1130	15	1177	57	4
33.1	162	56	0.34	11	0.000078	0.06	12.510	0.177	0.0576	0.0009		0.0799	0.0012							495	7
34.1	278	49	0.18	25	0.000147	0.26	9.626	0.133	0.0644	0.0009		0.1036	0.0014							636	8
35.1	616	359	0.58	44	0.000023	0.03	11.941	0.131	0.0579	0.0005		0.0837	0.0009							518	6
36.1	425	232	0.55	67	0.000122	0.21	5.451	0.064	0.0755	0.0006		0.1831	0.0022	1.862	0.031	0.0738	0.0009	0.710		1084	12	1035	24	-5
37.1	226	227	1.00	21	0.000090	0.16	9.134	0.126	0.0677	0.0011		0.1093	0.0015							669	9
38.1	177	174	0.99	85	-	<0.01	1.788	0.033	0.2397	0.0011		0.5597	0.0103	18.527	0.351	0.2401	0.0011	0.969		2865	43	3121	7	9
39.1	652	215	0.33	100	-	<0.01	5.597	0.065	0.0748	0.0005		0.1788	0.0021	1.853	0.025	0.0752	0.0005	0.861		1060	11	1074	14	1
40.1	294	149	0.51	130	0.000037	0.05	1.943	0.023	0.1864	0.0007		0.5145	0.0062	13.191	0.167	0.1860	0.0008	0.948		2676	26	2707	7	1
41.1	882	178	0.20	65	0.000068	0.12	11.643	0.135	0.0591	0.0005		0.0858	0.0010							531	6
42.1	350	144	0.41	26	0.000011	0.22	11.670	0.136	0.0598	0.0006		0.0855	0.0010							529	6
43.1	1283	1111	0.87	94	0.009839	19.09	11.677	0.129	0.2101	0.0026		0.0693	0.0022							432	13
44.1	86	52	0.61	24	0.000166	0.25	3.106	0.046	0.1244	0.0013		0.3212	0.0048	5.412	0.118	0.1222	0.0019	0.685		1796	23	1989	28	11
45.1	144	121	0.84	12	0.000080	0.14	10.630	0.153	0.0602	0.0012		0.0939	0.0014	0.764	0.046	0.0590	0.0034	0.250		579	8
46.1	317	178	0.56	72	0.000046	0.07	3.797	0.046	0.0977	0.0009		0.2632	0.0032	3.522	0.055	0.0970	0.0010	0.775		1506	16	1568	18	4
47.1	510	373	0.73	35	-	<0.01	12.551	0.140	0.0569	0.0005		0.0797	0.0009							494	5
48.1	162	97	0.60	30	-	<0.01	4.634	0.088	0.0821	0.0009		0.2160	0.0041	2.466	0.056	0.0828	0.0010	0.841		1261	22	1265	24	0
49.1	632	66	0.10	186	-	<0.01	2.917	0.034	0.1164	0.0004		0.3428	0.0040	5.504	0.067	0.1164	0.0004	0.950		1900	19	1902	7	0
50.1	1151	134	0.12	79	0.009370	16.70	12.592	0.151	0.1946	0.0048		0.0662	0.0012							413	7
51.1	359	250	0.70	30	0.001078	1.96	10.152	0.147	0.0683	0.0029		0.0966	0.0015							594	9
52.1	158	89	0.57	50	-	<0.01	2.722	0.036	0.1659	0.0012		0.3462	0.0046	5.720	0.309	0.1198	0.0063	0.246		1916	28	1954	93	2
53.1	919	76	0.08	136	0.000454	0.77	5.821	0.064	0.0817	0.0004		0.1705	0.0019	1.768	0.034	0.0752	0.0012	0.570		1015	10	1074	32	6
54.1	415	16	0.04	29	0.000194	0.35	12.122	0.151	0.0598	0.0008		0.0822	0.0010							509	6
54.2	306	15	0.05	24	0.000052	<0.01	10.846	0.152	0.0585	0.0006		0.0923	0.0013							569	8
55.1	482	283	0.59	34	0.000000	0.09	12.269	0.137	0.0581	0.0005		0.0814	0.0009							505	6
56.1	96	93	0.97	8	0.000970	1.81	10.733	0.200	0.0607	0.0019		0.0915	0.0019							564	11
Sample R4
								Total Ratios						Radiogenic Ratios								Age (Ma)
Grain.	U	Th	Th/U	206Pb*	204Pb/	f206	238U/		207Pb/			206Pb/		207Pb/		207Pb/				206Pb/		207Pb/		%
spot	(ppm)	(ppm)		(ppm)	206Pb	%	206Pb	±	206Pb	±		238U	±	235U	±	206Pb	±	r		238U	±	206Pb	±	Disc
1.1	221	92	0.42	14	0.000382	0.07	13.251	0.207	0.0570	0.0016		0.0754	0.0012							469	7
2.1	458	367	0.80	29	0.000756	0.64	13.744	0.182	0.0611	0.0033		0.0723	0.0010							450	6
3.1	311	183	0.59	20	-	0.28	13.450	0.195	0.0585	0.0014		0.0741	0.0011							461	7
4.1	105	69	0.66	7	0.000479	0.44	12.183	0.234	0.0610	0.0023		0.0817	0.0016							506	10
5.1	430	257	0.60	27	0.000150	<0.01	13.735	0.184	0.0557	0.0011		0.0728	0.0010							453	6
6.1	198	58	0.29	48	-	-0.06	3.586	0.050	0.1158	0.0013		0.2791	0.0039	4.475	0.080	0.1163	0.0013	0.776		1587	20	1900	20	16
7.1	192	93	0.48	13	0.000441	<0.01	13.113	0.206	0.0563	0.0016		0.0763	0.0012							474	7
8.1	95	45	0.47	18	-	<0.01	4.546	0.077	0.0812	0.0017		0.2206	0.0037	2.542	0.068	0.0836	0.0017	0.635		1285	21	1282	40	0
8.2	149	84	0.57	23	0.000271	0.46	5.553	0.079	0.0780	0.0011		0.1792	0.0026	1.832	0.063	0.0741	0.0023	0.420		1063	14	1045	63	-2
9.1	481	55	0.11	33	0.000123	0.16	12.369	0.174	0.0585	0.0011		0.0807	0.0012							500	7
10.1	237	154	0.65	15	0.000132	0.10	13.714	0.230	0.0568	0.0015		0.0728	0.0012							453	8
10.2	150	98	0.66	9	0.000385	0.47	13.557	0.203	0.0599	0.0015		0.0734	0.0011							457	7
11.1	246	172	0.70	16	0.000279	0.27	13.290	0.198	0.0585	0.0015		0.0750	0.0011							466	7
12.1	447	234	0.52	32	0.000278	0.58	11.858	0.227	0.0624	0.0010		0.0838	0.0016							519	10
13.1	367	205	0.56	24	0.000218	<0.01	12.923	0.178	0.0557	0.0012		0.0775	0.0011							481	7
14.1	652	135	0.21	48	0.000242	1.62	11.715	0.152	0.0709	0.0014		0.0840	0.0011							520	7
15.1	79	58	0.73	5	0.001077	0.38	12.571	0.267	0.0601	0.0026		0.0792	0.0017							492	10
16.1	240	113	0.47	100	0.000033	0.05	2.062	0.027	0.1661	0.0011		0.4847	0.0064	11.073	0.163	0.1657	0.0011	0.890		2548	28	2515	11	-1
17.1	135	59	0.44	53	0.000036	0.05	2.205	0.033	0.1861	0.0017		0.4533	0.0067	11.603	0.201	0.1856	0.0017	0.851		2410	30	2704	15	11
18.1	196	122	0.62	48	0.000053	0.08	3.490	0.048	0.1009	0.0012		0.2863	0.0039	3.955	0.073	0.1002	0.0012	0.749		1623	20	1628	23	0
19.1	390	311	0.80	25	0.000416	0.70	13.429	0.183	0.0619	0.0012		0.0739	0.0010							460	6
20.1	117	130	1.11	17	0.000329	0.56	5.762	0.095	0.0709	0.0016		0.1742	0.0029	1.781	0.049	0.0741	0.0016	0.597		1035	19	1045	45	1
21.1	201	149	0.74	58	0.000124	0.19	2.975	0.044	0.1172	0.0015		0.3355	0.0049	5.345	0.108	0.1155	0.0016	0.726		1865	24	1888	25	1
22.1	226	187	0.83	35	0.000110	0.19	5.611	0.087	0.0745	0.0012		0.1779	0.0028	1.787	0.050	0.0729	0.0017	0.557		1055	15	1011	47	-4
23.1	255	78	0.31	18	0.000241	<0.01	12.465	0.188	0.0570	0.0020		0.0802	0.0012							498	7
23.2	123	61	0.50	8	-	0.10	12.871	0.205	0.0575	0.0016		0.0776	0.0013							482	8
24.1	788	81	0.10	48	-	<0.01	13.990	0.172	0.0548	0.0008		0.0716	0.0009							446	5
25.1	281	205	0.73	17	0.000057	0.06	13.984	0.204	0.0563	0.0014		0.0715	0.0011							445	6
26.1	329	179	0.54	52	0.000069	0.12	5.435	0.071	0.0766	0.0010		0.1838	0.0024	1.917	0.035	0.0757	0.0010	0.705		1088	13	1086	26	0
27.1	420	325	0.78	24	0.000112	0.31	15.053	0.202	0.0575	0.0014		0.0662	0.0009							413	5
28.1	233	331	1.42	29	0.000163	0.28	6.956	0.097	0.0687	0.0012		0.1437	0.0020	1.349	0.030	0.0681	0.0012	0.621		865	15	872	36	1
29.1	598	395	0.66	44	0.000105	0.17	11.597	0.151	0.0594	0.0009		0.0861	0.0011							532	7
30.1	178	82	0.46	13	0.000681	1.02	12.130	0.207	0.0656	0.0021		0.0816	0.0014							506	9
31.1	146	128	0.88	12	0.009218	13.09	10.204	0.184	0.1645	0.0037		0.0852	0.0023							527	14
31.1b	211	168	0.80	13	0.002656	7.44	14.185	0.259	0.1150	0.0236		0.0653	0.0025							408	15
32.1	196	155	0.79	13	0.000265	0.34	13.184	0.227	0.0592	0.0018		0.0756	0.0013							470	8
32.2	209	141	0.67	13	0.000075	0.03	13.384	0.191	0.0565	0.0012		0.0747	0.0011							464	7
33.1	269	170	0.63	16	-	<0.01	14.255	0.229	0.0546	0.0014		0.0702	0.0011							438	7
34.1	380	81	0.21	38	-	<0.01	8.508	0.111	0.0667	0.0010		0.1171	0.0015	1.026	0.022	0.0635	0.0011	0.607		714	9	726	36	2
34.2	215	72	0.34	30	0.000094	0.16	6.134	0.088	0.0721	0.0015		0.1628	0.0024	1.587	0.050	0.0707	0.0020	0.458		972	13	949	57	-2
35.1	281	158	0.56	20	0.000280	0.62	11.987	0.171	0.0626	0.0014		0.0829	0.0012							513	7
36.1	325	76	0.23	37	0.000086	0.15	7.448	0.120	0.0745	0.0021		0.1332	0.0021	1.246	0.046	0.0678	0.0023	0.433		806	13	864	70	7
37.1	224	75	0.34	25	0.000218	0.38	7.687	0.117	0.0733	0.0015		0.1296	0.0020	1.254	0.034	0.0702	0.0016	0.563		786	11	933	46	16
38.1	184	66	0.36	30	0.000131	0.22	5.288	0.078	0.0777	0.0013		0.1887	0.0028	1.973	0.052	0.0758	0.0017	0.560		1114	15	1091	44	-2
39.1	146	82	0.56	10	0.000256	0.47	13.152	0.258	0.0603	0.0024		0.0757	0.0015							470	9
40.1	300	90	0.30	45	0.000071	0.12	5.710	0.085	0.0746	0.0013		0.1749	0.0026	1.774	0.044	0.0735	0.0014	0.607		1039	14	1029	39	-1
41.1	221	144	0.65	36	0.000152	0.26	5.226	0.082	0.0777	0.0014		0.1909	0.0030	1.989	0.051	0.0756	0.0016	0.608		1126	16	1084	41	-4
42.1	272	196	0.72	71	0.000030	0.05	3.312	0.048	0.1058	0.0012		0.3018	0.0044	4.385	0.096	0.1054	0.0017	0.663		1700	22	1721	30	1
43.1	307	192	0.63	20	0.000069	0.35	13.439	0.212	0.0591	0.0016		0.0741	0.0012							461	7
44.1	265	176	0.66	17	0.000186	0.32	13.387	0.220	0.0589	0.0017		0.0745	0.0013							463	8
45.1	768	182	0.24	97	0.000065	0.11	6.777	0.091	0.0722	0.0008		0.1474	0.0020	1.449	0.026	0.0713	0.0009	0.741		886	11	965	25	8
46.1	288	204	0.71	18	-	<0.01	13.890	0.224	0.0551	0.0016		0.0721	0.0012							449	7
47.1	167	189	1.13	13	0.000228	<0.01	10.886	0.205	0.0589	0.0021		0.0919	0.0018							567	10
48.1	912	111	0.12	68	0.000000	<0.01	11.539	0.157	0.0568	0.0009		0.0868	0.0012							537	7
49.1	151	111	0.74	9	0.000424	0.98	14.054	0.305	0.0636	0.0032		0.0705	0.0016							439	10
50.1	125	131	1.04	18	-	<0.01	5.840	0.110	0.0751	0.0020		0.1712	0.0032	1.773	0.058	0.0751	0.0020	0.579		1019	18	1071	54	5
51.1	252	135	0.54	16	-	0.34	13.286	0.179	0.0591	0.0011		0.0750	0.0010							466	6
52.1	96	58	0.60	22	0.000024	0.04	3.758	0.057	0.0999	0.0013		0.2660	0.0040	3.650	0.073	0.0995	0.0013	0.759		1520	20	1615	24	6
53.1	352	165	0.47	54	-	<0.01	5.620	0.068	0.0755	0.0007		0.1780	0.0022	1.862	0.029	0.0759	0.0008	0.769		1056	12	1092	20	3
54.1	184	86	0.46	81	0.000162	0.22	1.949	0.026	0.1861	0.0011		0.5118	0.0068	12.992	0.197	0.1841	0.0013	0.882		2664	29	2690	12	1
55.1	112	63	0.57	10	0.000203	0.29	9.874	0.170	0.0628	0.0015		0.1010	0.0018							620	10
56.1	612	556	0.91	38	0.000265	0.50	13.771	0.166	0.0600	0.0008		0.0723	0.0009							450	5
57.1	716	130	0.18	42	0.000459	1.26	14.812	0.174	0.0653	0.0007		0.0667	0.0008							416	5
58.1	519	521	1.00	35	-	0.11	12.742	0.160	0.0578	0.0009		0.0784	0.0010							487	6
59.1	237	202	0.85	15	0.000393	<0.01	13.403	0.186	0.0555	0.0013		0.0747	0.0011							464	6
60.1	565	138	0.24	51	0.000117	0.23	9.608	0.116	0.0628	0.0007		0.1038	0.0013							637	7
Sample R19A
								Total Ratios						Radiogenic Ratios								Age (Ma)
Grain.	U	Th	Th/U	Pb*	204Pb/	f206	238U/		207Pb/			206Pb/		207Pb/		207Pb/				206Pb/		207Pb/		%
spot	(ppm)	(ppm)		(ppm)	206Pb	%	206Pb	±	206Pb	±		238U	±	235U	±	206Pb	±	r		238U	±	206Pb	±	Disc
1.1	182	103	0.57	11.7	0.000037	0.02	13.329	0.192	0.0565	0.0011		0.0750	0.0011							466	7
2.1	103	66	0.64	6.6	-	0.33	13.334	0.269	0.0590	0.0019		0.0747	0.0015							465	9
3.1	284	106	0.37	28.6	0.002873	5.89	8.508	0.123	0.1104	0.0017		0.1106	0.0019							676	11
4.1	119	59	0.49	8.2	0.000528	<0.01	12.421	0.282	0.0569	0.0018		0.0805	0.0019							499	11
5.1	173	97	0.56	14.8	0.000233	<0.01	10.033	0.208	0.0591	0.0016		0.0998	0.0021							613	12
6.1	296	92	0.31	19.7	0.000849	2.90	12.919	0.201	0.0799	0.0024		0.0752	0.0012							467	7
7.1	208	138	0.67	13.9	0.000090	0.33	12.813	0.202	0.0595	0.0013		0.0778	0.0013							483	7
8.1	154	101	0.66	12.5	0.000249	1.12	10.546	0.196	0.0684	0.0020		0.0938	0.0018							578	11
9.1	445	127	0.28	60.5	0.000004	0.01	6.312	0.079	0.0732	0.0007		0.1584	0.0020	1.599	0.026	0.0732	0.0007	0.778		948	11	1019	21	7
10.1	256	155	0.60	16.4	0.000559	1.21	13.446	0.213	0.0659	0.0014		0.0735	0.0012							457	7
11.1	727	541	0.74	70.4	0.000679	0.75	8.866	0.115	0.0685	0.0016		0.1119	0.0015							684	9
12.1	242	181	0.75	17.0	0.000202	0.13	12.227	0.187	0.0585	0.0012		0.0817	0.0013							506	8
13.1	470	308	0.66	37.5	-	0.31	10.765	0.128	0.0617	0.0007		0.0926	0.0011							571	7
14.1	418	112	0.27	96.6	-	<0.01	3.716	0.043	0.0974	0.0005		0.2691	0.0031	3.615	0.046	0.0974	0.0005	0.899		1536	16	1575	10	2
15.1	404	175	0.43	183.0	0.000087	0.12	1.896	0.021	0.1622	0.0006		0.5268	0.0059	11.701	0.140	0.1611	0.0007	0.936		2728	25	2467	7	-11
16.1	976	440	0.45	61.9	0.004780	10.15	13.545	0.148	0.1371	0.0008		0.0663	0.0012							414	7
17.1	133	152	1.14	10.1	-	0.14	11.381	0.175	0.0595	0.0012		0.0877	0.0014							542	8
18.1	236	102	0.43	65.1	0.000031	0.05	3.115	0.042	0.1088	0.0007		0.3209	0.0044	4.795	0.074	0.1084	0.0008	0.885		1794	21	1772	13	-1
19.1	564	136	0.24	83.1	0.000118	0.20	5.831	0.068	0.0775	0.0016		0.1712	0.0020	1.788	0.046	0.0758	0.0017	0.453		1018	11	1089	46	6
20.1	266	187	0.70	17.8	0.000098	<0.01	12.858	0.167	0.0562	0.0009		0.0778	0.0010							483	6
21.1	601	208	0.35	96.8	0.001418	2.40	5.331	0.059	0.0958	0.0010		0.1831	0.0021	1.910	0.085	0.0757	0.0033	0.254		1084	11	1086	86	0
22.1	602	393	0.65	73.5	0.002149	3.58	7.033	0.080	0.1122	0.0010		0.1371	0.0016	1.548	0.093	0.0819	0.0048	0.198		828	9	1242	115	33
23.1	64	24	0.38	9.6	0.000086	0.15	5.710	0.098	0.0722	0.0013		0.1749	0.0030	1.712	0.056	0.0710	0.0020	0.528		1039	17	958	57	-8
24.1	405	197	0.49	28.1	0.000110	0.25	12.392	0.161	0.0592	0.0007		0.0805	0.0011							499	6
25.1	233	101	0.43	15.7	0.000229	0.09	12.712	0.171	0.0577	0.0009		0.0786	0.0011							488	6
26.1	322	120	0.37	43.0	0.000048	0.08	6.438	0.077	0.0686	0.0006		0.1552	0.0019	1.454	0.022	0.0679	0.0006	0.794		930	10	867	19	-7
27.1	376	262	0.70	22.9	-	0.07	14.109	0.171	0.0563	0.0007		0.0708	0.0009							441	5
28.1	364	85	0.23	82.7	0.000937	1.45	3.784	0.046	0.1246	0.0009		0.2605	0.0032	4.018	0.093	0.1119	0.0022	0.533		1492	16	1830	35	18
29.1	420	280	0.67	65.8	0.000201	0.34	5.479	0.063	0.0804	0.0005		0.1819	0.0021	1.945	0.034	0.0776	0.0010	0.670		1077	12	1135	26	5
30.1	239	30	0.12	18.9	-	0.38	10.855	0.137	0.0621	0.0010		0.0918	0.0012							566	7
31.1	224	156	0.69	68.1	0.000005	0.01	2.834	0.034	0.1368	0.0007		0.3529	0.0043	6.652	0.088	0.1367	0.0007	0.914		1948	20	2186	9	11
32.1	241	56	0.23	19.2	-	0.14	10.763	0.140	0.0602	0.0009		0.0928	0.0012							572	7
33.1	3185	377	0.12	218.3	0.011397	24.63	12.535	0.131	0.2530	0.0007		0.0601	0.0025							376	15
34.1	293	191	0.65	17.8	0.000423	1.56	14.118	0.185	0.0682	0.0011		0.0697	0.0009							435	6
35.1	224	303	1.35	19.7	0.000012	<0.01	9.769	0.127	0.0591	0.0009		0.1026	0.0014							629	8
36.1	35	34	0.98	4.7	0.001176	1.97	6.309	0.175	0.0954	0.0043		0.1554	0.0054	1.687	0.400	0.0788	0.0185	0.147		931	30	1166	465	20
37.1	275	51	0.19	24.8	0.002700	5.66	9.499	0.116	0.1065	0.0010		0.0993	0.0015							610	9
38.1	206	150	0.73	65.8	0.000216	0.33	2.688	0.033	0.1177	0.0008		0.3708	0.0046	5.870	0.096	0.1148	0.0012	0.751		2033	21	1877	19	-8
39.1	429	260	0.61	50.1	0.003221	7.45	7.361	0.084	0.1262	0.0017		0.1257	0.0020							763	11
40.1	149	97	0.65	39.9	0.000040	0.06	3.217	0.041	0.0999	0.0008		0.3106	0.0040	4.254	0.065	0.0993	0.0008	0.837		1744	20	1612	16	-8
41.1	252	22	0.09	22.2	0.000080	0.07	9.754	0.124	0.0613	0.0008		0.1024	0.0013							629	8
42.1	85	256	3.03	6.8	0.000143	<0.01	10.624	0.171	0.0586	0.0013		0.0942	0.0016							580	9
43.1	578	456	0.79	39.3	0.005138	8.90	12.633	0.147	0.1280	0.0008		0.0721	0.0012							449	7
44.1	85	43	0.50	6.7	0.000898	0.32	10.953	0.279	0.0614	0.0033		0.0910	0.0024							562	14
45.1	96	62	0.65	26.6	0.000267	0.42	3.094	0.047	0.1120	0.0012		0.3226	0.0049	4.917	0.091	0.1105	0.0012	0.819		1802	26	1808	19	0
46.1	2864	1349	0.47	113.5	0.009496	19.91	21.669	0.230	0.2103	0.0007		0.0370	0.0012							234	8
47.1	270	44	0.16	96.2	-	<0.01	2.409	0.028	0.1457	0.0007		0.4152	0.0049	8.358	0.107	0.1460	0.0007	0.917		2239	22	2299	9	3
48.1	958	209	0.22	63.0	0.013441	25.36	13.059	0.141	0.2582	0.0047		0.0572	0.0026							358	16
49.1	154	22	0.14	19.2	0.002061	3.53	6.870	0.093	0.1004	0.0017		0.1398	0.0019	1.292	0.087	0.0670	0.0044	0.199		844	12	838	138	-1
50.1	353	359	1.02	29.0	0.000012	<0.01	10.449	0.118	0.0591	0.0008		0.0958	0.0011							590	6
51.1	506	311	0.61	28.2	0.006426	11.90	15.416	0.173	0.1496	0.0010		0.0571	0.0012							358	7
52.1	1496	233	0.16	96.2	0.010012	18.72	13.362	0.139	0.2054	0.0007		0.0608	0.0019							381	11
53.1	459	605	1.32	38.6	-	0.06	10.236	0.114	0.0604	0.0005		0.0976	0.0011							601	7
Notes :		1. Uncertainties given at the one s level.
		2. Error in FC1 Reference zircon calibration was 0.95% for the analytical session.
			( not included in above errors but required when comparing data from different mounts).
		3. f206 % denotes the percentage of 206Pb that is common Pb.
		4. For areas older than ~800 Ma correction for common Pb made using the measured 204Pb/206Pb ratio.
		5. For areas younger than ~800 Ma correction for common Pb made using the measured 238U/206Pb and 207Pb/206Pb ratios
			following Tera and Wasserburg (1972) as outlined in Williams (1998).
		6. For % Disc, 0% denotes a concordant analysis.
